# Supplementary material for: Bibliometric analysis of research on the role of intestinal microbiota in obesity
Source: PeerJ journal article supplement (doi:10.7717/peerj.5091), 2018-06-29

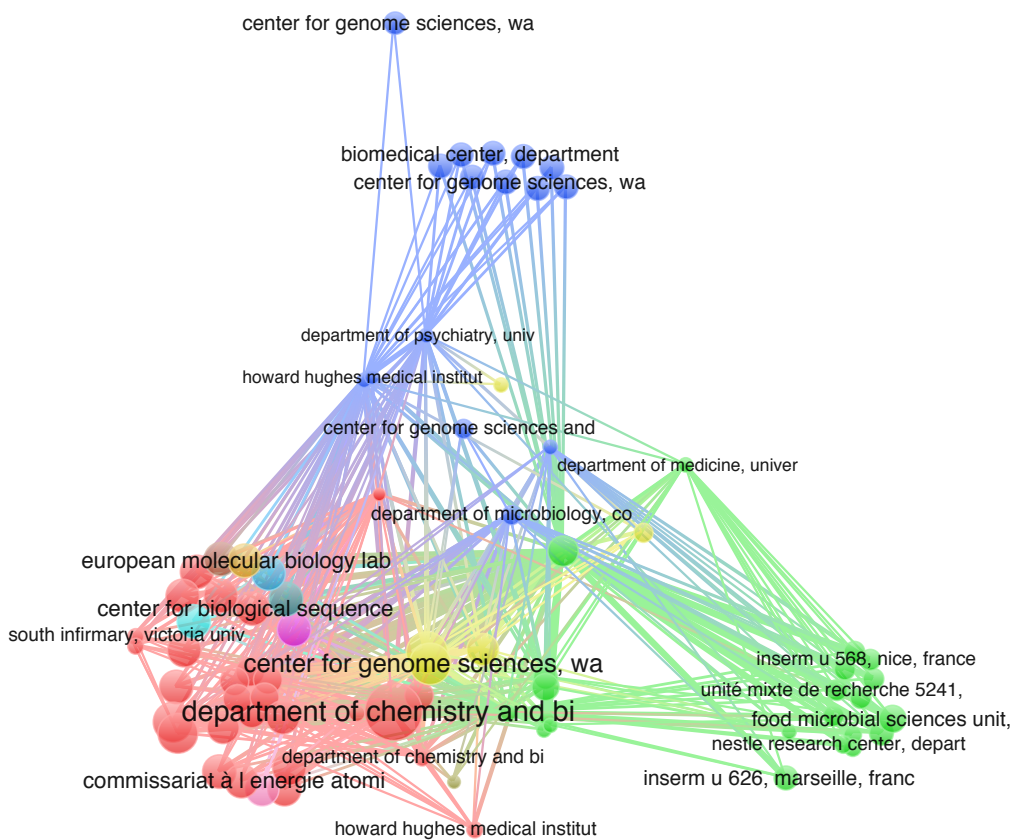

Supplement: Fig._S5.pdf [file Fig._S5.pdf]
