# Supplementary material for: Bibliometric analysis of research on the role of intestinal microbiota in obesity
Source: PubMed Central journal article supplement (PMC6027659; doi:10.7717/peerj.5091), 2018-06-29

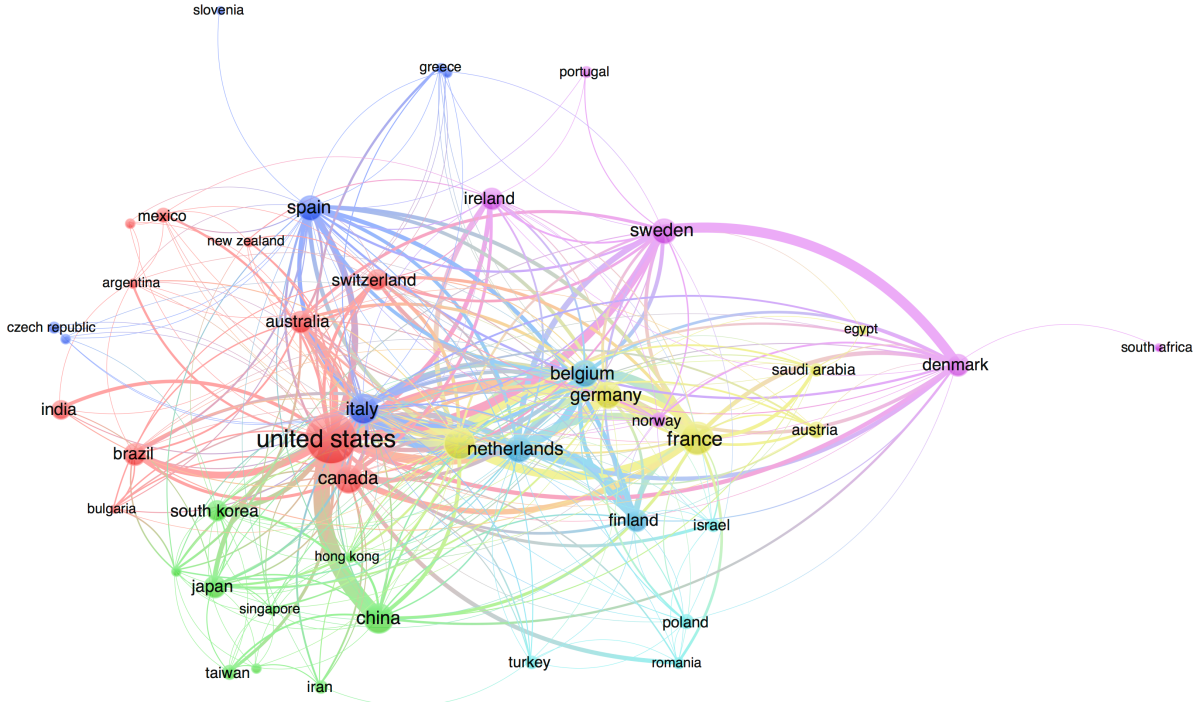

Supplement: peerj-06-5091-s004.pdf [file peerj-06-5091-s004.pdf]
